# Supplementary material for: Combination of DNA Vaccine and Immune Checkpoint Blockades Improves the Immune Response in an Orthotopic Unresectable Glioblastoma Model
Source: MDPI journal article supplement (doi:10.3390/pharmaceutics14051025), 2022-05-10
Supplement: s1 [file s1]

```

      18
      ↓
1  MKCLLYLAFL FIGVNCKFTI VFPHNQKGNW KNVPSNYHYC PSSSDLNWHN
      51  55
      ↓  ↓
51 DLIGTAIQVK MPKSHKAIQA DGWMCHASKW VTTCDFRWYG PKYITQSIRS

101 FTSPVEQCKE SIEQTKQGTW LNPGFPPQSC GYATVTDAEA VIVQVTPHHV
      191 196
      ↓  ↓
151 LVDEYTGWV DSQFINGKCS NYICPTVHNS TTWHS DYKVK GLCDSNLISM
      217
      ↓
201 DITFFSEDGE LSSLGKEGTG FRSNYFAYET GGKACKMQYC KHWGVRLPSG

251 VWFEMADKDL FAAARFPECP EGSSISAPSQ TSVDVSLIQD VERILDYSLC

301 QETWSKIRAG LPISPVDLSY LAPKNPGTGP AFTIINGTLK YFETRYIRVD
      368
      ↓
351 IAAPILSRMV GMISGTTTER ELWDDWAPYE DVEIGPNGVL RTSSGYKFPL

401 YMIGHGMLDS DLHLSSKAQV FEHPHIQDAA SQLPDDESLE FGD TGLSKNP

451 IELVEGWFS WKSSIASFFF IIGLIIGLFL VLRVGIHL CI KLKHTKKRQI

501 YTDIEMNRLG K*

```

**Figure S1.** Protein sequence of VSV-G. The possible insertion sites are colored in blue.

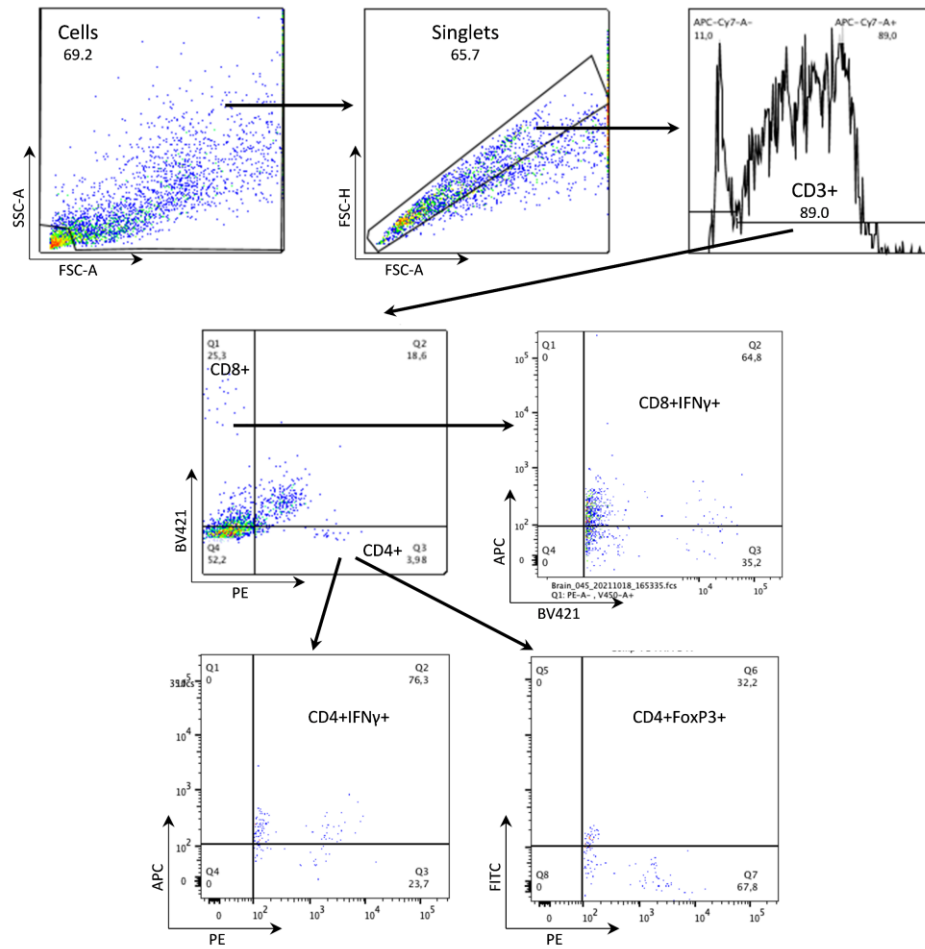

**Figure S2.** FACS gating strategy for T cell analysis.

|                              | d7                                                                                  | d14                                                                                 | d21                                                                                  | d90                                                                                   |
|------------------------------|-------------------------------------------------------------------------------------|-------------------------------------------------------------------------------------|--------------------------------------------------------------------------------------|---------------------------------------------------------------------------------------|
| Untreated                    | 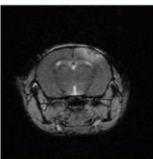   |    |    |                                                                                       |
| pTOP                         |    |    |    |                                                                                       |
| ICBs<br>Non-responder        |    |    |    |                                                                                       |
| ICBs<br>Responder            |    |    |    |    |
| Combination<br>Non-responder |   |   |   |                                                                                       |
| Combination<br>Responder     |  |  |  |  |

**Figure S3.** Follow-up of tumoral growth by MRI. A representative mouse was selected for each group.

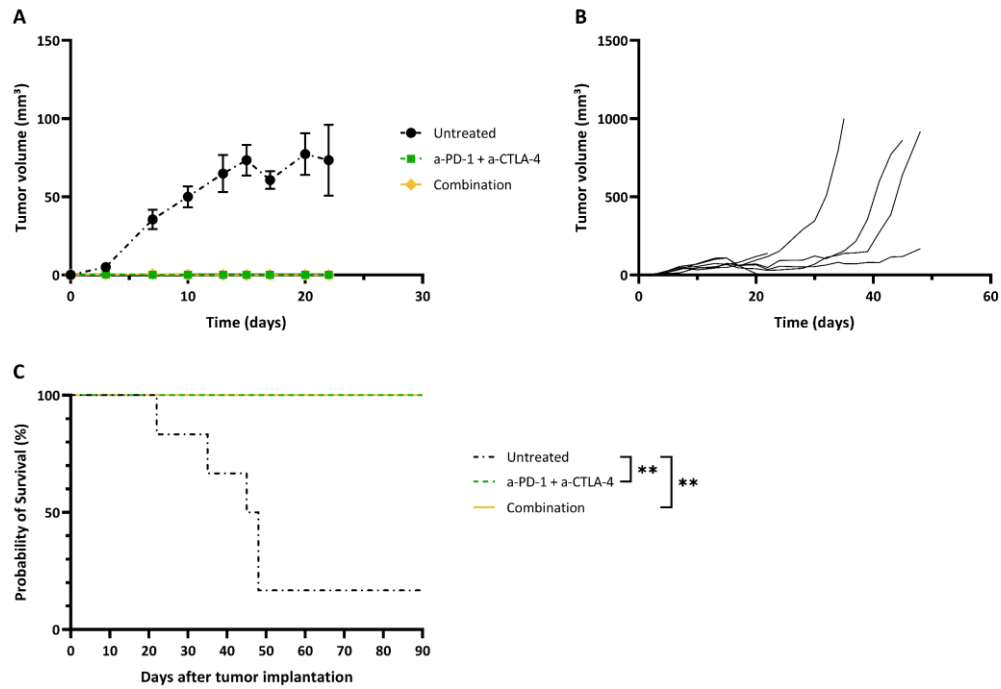

**Figure S4.** Rechallenge of long-term survivors. (A) Comparison of tumor volumes between the three groups. Values are mean  $\pm$  SEM;  $n = 3-6$ . (B) Evolution of tumor volumes of each mouse from the untreated group;  $n = 6$ . (C) Survival curves following rechallenge of long-term survivors from the group treated with ICBs and with the combination;  $n = 3-6$ . Statistical analyses were performed using Mantel-Cox test (\*\*  $P < 0.01$ ).
